# Supplementary material for: Crosslinked siloxane–silsesquioxane elastomer with pyrene functionalization for rapid adsorption of benzene, toluene, and xylene (BTX) from water and sensing of charged species
Source: Royal Society of Chemistry journal article supplement (doi:10.1039/d4py00394b), 2024-01-01
Supplement: d4py00394b1.pdf [file d4py00394b1.pdf]

## **Crosslinked Siloxane-Silsesquioxane Elastomer with Pyrene Functionalization for Rapid Adsorptions of Benzene, Toluene, and Xylene (BTX) from Water and Sensing of Charged Species**

*Teeraya Bureerug,<sup>†</sup> Chidchanok Wannasiri,<sup>†</sup> Supphachok Chanmungkalakul,<sup>†</sup> Mongkol Sukwattanasinitt,<sup>§</sup> Vuthichai Ervithayasuporn,<sup>†\*</sup> and Thanthapatra Bunchuay,<sup>†\*</sup>*

<sup>†</sup>Department of Chemistry, Center of Excellence for Innovation in Chemistry (PERCH-CIC), and Center for Inorganic and Materials Chemistry, Faculty of Science, Mahidol University, 272 RAMA VI road, Ratchathewi Bangkok 10400, Thailand.

<sup>§</sup>Department of Chemistry, Faculty of Science, Chulalongkorn University, Bangkok 10330, Thailand

\*Corresponding Author: V. Ervithaysuporn (V.E.)

Email: vuthichai.erv@mahidol.edu; maldiniandg@hotmail.com

T. Bunchuay (T.B.)

Email: Thanthapatra.bun@mahidol.edu

## Table of contents

|                                                                                                           | Pages |
|-----------------------------------------------------------------------------------------------------------|-------|
| Measurements                                                                                              | S4    |
| Synthesis of Mono Pyrene-Functionalized SQ cage                                                           | S5    |
| Study of anions and cations sensing                                                                       | S5    |
| Recyclability of <b>Py-CSSE</b> as an adsorbent for fluoride and cyanide ion                              | S5    |
| Study of copper adsorption                                                                                | S6    |
| Recyclability of <b>Py-CSSE</b> as an adsorbent for copper ion                                            | S6    |
| Calculation of the kinetic constant                                                                       | S7    |
| Calculation of the ceramic yield                                                                          | S7    |
| Compressive test                                                                                          | S7    |
| Quantitative Analysis                                                                                     | S7    |
| Structure of <b>Py-CSSE</b> material                                                                      | S8    |
| <sup>13</sup> C-NMR spectrum                                                                              | S8    |
| The contact angle of <b>Py-CSSE</b> without/with HMDSO modification                                       | S9    |
| Table of FTIR peak assignments                                                                            | S9    |
| XRD diffraction curves of <b>OVS</b> and <b>Py-CSSE</b>                                                   | S10   |
| Thermal gravimetric analysis (TGA) of <b>OVS</b> under N <sub>2</sub> and O <sub>2</sub> atmosphere       | S11   |
| Thermal gravimetric analysis (TGA) of <b>Py-CSSE</b> under N <sub>2</sub> and O <sub>2</sub> atmosphere   | S12   |
| Differential scanning calorimeter (DSC) heating thermograms of <b>Py-CSSE</b>                             | S13   |
| FESEM images of <b>Py-CSSE</b>                                                                            | S13   |
| Energy Dispersive X-ray Analysis of a dried sample of <b>Py-CSSE</b><br>suspension in DMF medium          | S14   |
| The stress-strain curves for <b>Py-CSSE</b>                                                               | S14   |
| Concentration-Independent Excimer Formation of <b>Mono-PySQ</b> in THF solvent<br>at virous concentration | S15   |
| Table of ratio of emission intensity of excimer/monomer of <b>Mono-PySQ</b>                               | S15   |
| Table of adsorption capacity values of <b>Py-CSSE</b> in different solvents                               | S16   |
| Adsorption capacities of <b>Py-CSSE</b> in different solvents and BTX                                     | S16   |

|                                                                                                                                      |     |
|--------------------------------------------------------------------------------------------------------------------------------------|-----|
| The time-dependent adsorption capacity of <b>Py-CSSE</b> for <i>o</i> -xylene adsorption                                             | S17 |
| Table of BTX adsorption comparison of synthesized materials                                                                          | S17 |
| Fluorescence spectra of <b>Py-CSSE</b> in various solvents before and after anions addition                                          | S18 |
| LOD and LOQ plot from fluorescence titration of <b>Py-CSSE</b><br>with fluoride and cyanide ion in various solvents                  | S18 |
| Fluorescence spectra of <b>Py-CSSE</b> in various solvents before and after cations addition                                         | S19 |
| LOD and LOQ plot from fluorescence titration of <b>Py-CSSE</b><br>with copper ion in various solvents                                | S19 |
| Table of LOD and LOQ of <b>Py-CSSE</b> with fluoride, cyanide<br>and copper ions from fluorescence emission titration                | S20 |
| The kinetics of <b>Py-CSSE</b> upon excessive addition of TBAF, TBACN,<br>and Cu(ClO <sub>4</sub> ) <sub>2</sub> in various solvents | S21 |
| Table of kinetic constant of the reaction between <b>Py-CSSE</b> with<br>anions and metal in different media                         | S21 |
| FTIR spectra of <b>Py-CSSE</b> before and after ion addition at solid state                                                          | S22 |
| XPS spectra of <b>Py-CSSE</b> before and after Cu adsorption                                                                         | S22 |
| The Cu <sup>2+</sup> adsorption efficiency of <b>Py-CSSE</b> by varying amounts of adsorbent                                         | S23 |
| The time-dependent Cu <sup>2+</sup> adsorption efficiency and reusability                                                            | S23 |
| FESEM image of a dried sample of <b>Py-CSSE</b> before and after Cu <sup>2+</sup> addition                                           | S23 |
| Elemental mapping of a dried sample of <b>Py-CSSE</b> with Cu <sup>2+</sup> ions                                                     | S24 |
| Energy Dispersive X-ray Analysis of a dried sample of <b>Py-CSSE</b> with Cu <sup>2+</sup> ions                                      | S24 |
| Epifluorescence microscopy of <b>Py-CSSE</b> before and after ions addition                                                          | S25 |

## Measurements

**Fourier-Transform Infrared Spectroscopy (FT-IR) Measurement** FT-IR spectra were recorded using the attenuated total reflectance (ATR) technique on a Bruker model Alpha spectrometer.

**Solid-state Nuclear Magnetic Resonance Spectroscopy (Solid-state NMR)** Solid-state NMR was done with Bruker ASCEND 400 MHz WB NMR/DNP spectrometer for solids.

**Spectroscopy (UV-Vis Absorption and Fluorescent Emission Measurement)** UV-vis spectroscopy was performed on a UV-vis spectrophotometry (Shimadzu UV-2600), whereas all fluorescence spectra were recorded using a spectrofluorometric technique (Horiba FluoroMax4+, integration time 0.1 s, slit width 2 nm) with Fluoromax software.

**Morphological and elemental analysis** FESEM imaging and energy-dispersive X-ray elemental analysis were carried out using an FEI Quanta 400 SEM with EDS.

**Thermogravimetric analysis (TGA)** The TA Instruments SDT 2690 device was used for thermogravimetric analysis (TGA). The thermal stability of the Py-CSSE was analysed under N<sub>2</sub> and O<sub>2</sub> at 20 °C min<sup>-1</sup> from 40 - 800 °C.

**Differential scanning calorimetry (DSC)** DSC analyses were conducted by using a DSC 3500 Sirius instrument with heating and cooling rate of 10 °C min<sup>-1</sup> at the temperature range of 50 – 400 °C

**X-Ray Diffractometer (XRD)** The X-ray powder diffractograms were obtained on a Bruker AXS X-ray diffractor Model D8 Advance, Germany with Cu radiation,  $\lambda = 1.54184 \text{ \AA}$ . Detector is LYNXEYE\_XE\_T (1D mode).

**Inductively coupled plasma mass spectrometry (ICP-MS)** A Perkin Elmer NexION 2000 ICP-MS was used as an element detector. Data processing was done through the Syngistix<sup>TM</sup> software.

**Compressive test** the material was measured by Universal testing machine (INSTRON 5569) with loading force 1 kN. The speed of test as 12 mm/minute. Average size of material: thickness 10.93 mm and diameter 39.64 mm

### Synthesis of Mono Pyrene-Functionalized SQ cage (Mono-PySQ)

The synthesis of **Mono-PySQ** was modified from our previously reported methodology. **OVS** (632 mg, 1 mmol), 1-bromopyrene (281 mg, 1 mmol) and triphenylphosphine (26.25 mg, 0.2 mmol) were mixed into a thick-wall and sealed cylindrical vessel with a mixture of THF and Et<sub>3</sub>N (8:2 v/v, 10 mL). The solution was deoxygenated by flowing N<sub>2</sub> to the mixture for 10 minutes. Subsequently, Pd(OAc)<sub>2</sub> (22.45 mg, 0.1 mmol) was added. The reaction was heated to 80 °C and stirred for 48 hours. After the mixture cooled down to room temperature, the solid residues were filtered off and the filtrate was collected, concentrated, and purified via silica-gel column chromatography to afford the pale-yellow powder of **Mono-PySQ** in 20 %yield.

### Study of anions and cations sensing

The changes in fluorescent emission were investigated by adding anion or metal into a suspension of 2 mg **Py-CSSE** in 2 ml different media (THF, DMF and DMSO solvent). Fluorescent emission spectra for **Py-CSSE** in presence of 0.2 mM of different anions TBAX (X = F<sup>-</sup>, Cl<sup>-</sup>, Br<sup>-</sup>, I<sup>-</sup>, NO<sub>3</sub><sup>-</sup>, CN<sup>-</sup>, SCN<sup>-</sup>, HSO<sub>4</sub><sup>-</sup> and ClO<sub>4</sub><sup>-</sup>) and cations as their ClO<sub>4</sub><sup>-</sup> salts (Cr<sup>2+</sup>, Mn<sup>2+</sup>, Fe<sup>2+</sup>, Co<sup>2+</sup>, Cu<sup>2+</sup>, Zn<sup>2+</sup>, and Cd<sup>2+</sup>) ion in 100 µl.

### Recyclability of Py-CSSE as an adsorbent for fluoride and cyanide ion

Reusability of **Py-CSSE** was evaluated by adding a solution of TBAF (0.96 mM, 0.4 mL) into a suspension of **Py-CSSE** (10 mg) in THF and standing at room temperature for 5 minutes. After the first cycle of the adsorption process, **Py-CSSE** was removed and the resulting solution was collected and diluted with THF to adjust volume to 0.20 mL. The concentration of fluoride after adsorption was determined by the aforementioned method. The recycled **Py-CSSE** was washed thoroughly with MeOH and stirring in MeOH for 4 hours then dried prior to use in the subsequent cycles. For cyanide adsorption capacity measurements, the experiments were performed similarly to the case of fluoride but the initial concentration of TBACN was adjusted to 0.37 mM.

### **Study of copper (II) adsorption**

Time-dependent adsorption capacity of **Py-CSSE** was determined by using inductively coupled plasma mass spectrometry (ICP-MS) measurements and  $\text{CuCl}_2$  was used as a source of copper. 10 mg of **Py-CSSE** suspension in 10 mL of THF medium were kept in contact with 0.37 mM of copper by varying reaction times (5, 15, 30, 45, 60, and 75 min). After the adsorption process finished, **Py-CSSE** was separated from each batch via centrifugation. Subsequently, 2 mL of supernatant liquids from each batch were collected carefully, filtered, and dried under reduced pressure, respectively. After that, each batch of **Py-CSSE** was re-dissolved into 10 mL of type-I distilled water containing 2%  $\text{HNO}_3$  and 5% HCl before getting measured by ICP-MS.

### **Recyclability of Py-CSSE as an adsorbent for copper ion**

To study the recyclability of **Py-CSSE**. For the first cycle, 10 mg of **Py-CSSE** was used and 10 mL of 0.37 mM  $\text{CuCl}_2$  in THF was added for 10 min. Subsequently, the solution was filtrated and collected carefully in 2 mL. after that the supernatant liquid was dried under reduced pressure before being redissolved in type-I distilled water containing 2%  $\text{HNO}_3$ / 5% HCl and measured by ICP-MS. Then, the solid residue of **Py-CSSE** was collected by filtration and dried before adding 0.01 M of EDTA disodium salt solution to remove metal from the polymer. This step was carried out over approximately 3 hours at room temperature. Finally, the polymer was dried under vacuum overnight before studying adsorption for the next cycle. The same procedure was repeated for 2<sup>nd</sup> to 4<sup>th</sup> cycles maintaining consistency in protocol and utilizing  $\text{CuCl}_2$  as a source of Cu throughout the process.

### Calculation of the kinetic constant

At the low concentrations, the kinetic constant could be calculated by the following equation:

$$\ln[I] = kt + \ln[I]_0$$

When  $I$  and  $I_0$  were the emission intensity before and after the addition of anions,  $t$  is a time (s). Kinetic constant ( $k$ ) could be calculated from the slope of graph between  $\ln[I]$  against  $t$

### Calculation of the ceramic yield

$$\text{Ceramic yield} = \frac{\text{Ceramic weight}}{\text{original polymer weight}} \times 100$$

### Compressive test

In uniaxial compression tests, cylindrical **Py-CSSE** with a 40 mm diameter and 10 mm height was used. The experiment performed with loading force 1 kN. The speed of test as 12 mm/min. The %strain of **Py-CSSE** was calculated by the following equation.

$$\% \text{strain} = \frac{\Delta L}{L} \times 100, \text{ where } \Delta L \text{ is the change in length and } L \text{ is original length.}$$

The stress of **Py-CSSE** was given by the equation as below

$$\text{Stress} = \frac{F}{A}, \text{ where } F \text{ is loading force (N) and } A \text{ is cross-section area of material (m}^2\text{).}$$

### Quantitative Analysis

The limit of detection (LOD) and limit of quantitative (LOQ) were calculated from fluorescence titration experiments which according to the equations as below

$$\text{LOD} = 3\sigma/S$$

$$\text{LOQ} = 10\sigma/S$$

Where,  $\sigma$  is the standard deviation of the response and  $S$  is the slope of calibration curve.

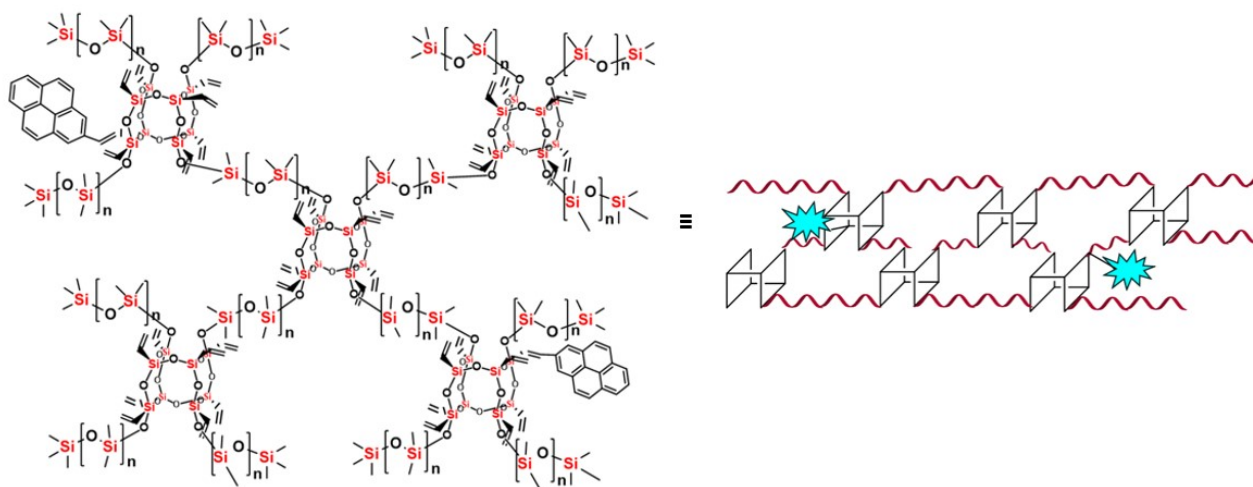

**Figure. S1** Structure of Py-CSSE material

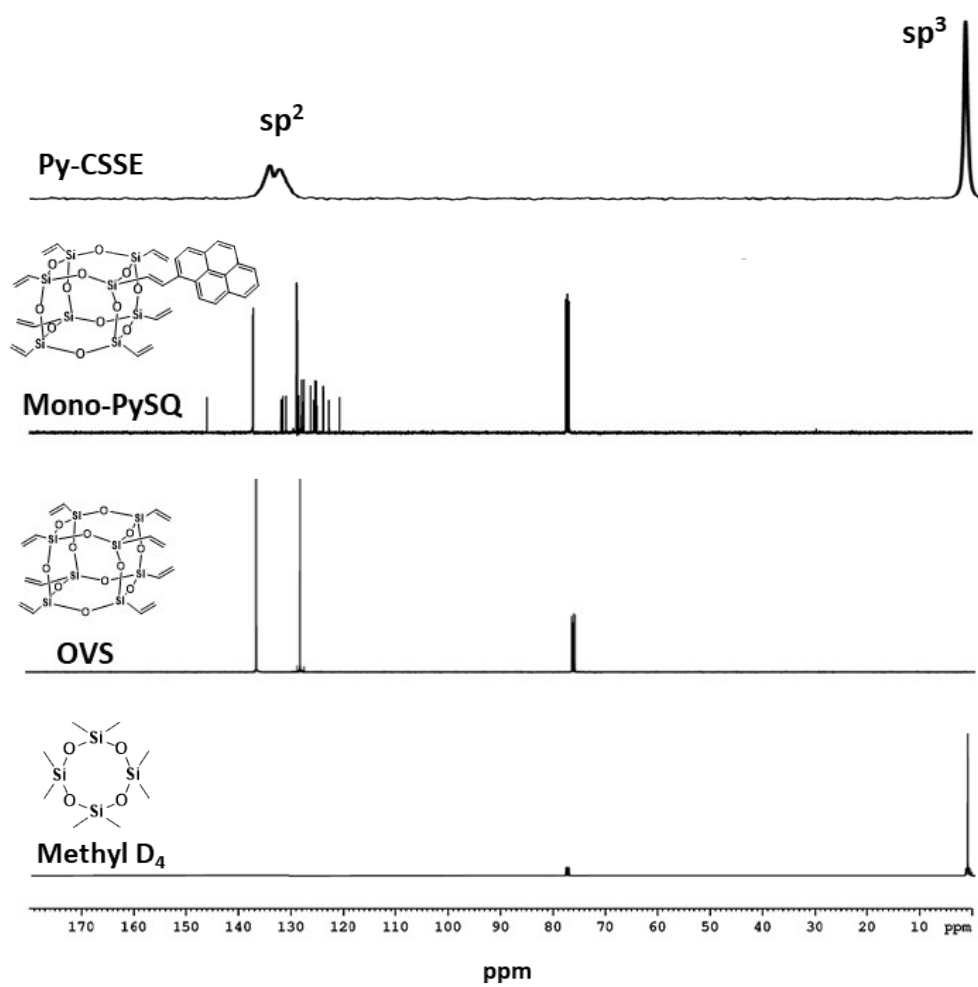



**Figure. S2**  $^{13}\text{C}$ -NMR spectra of **Mono-PySQ**, **OVS** and **Methyl D<sub>4</sub>** in  $\text{CDCl}_3$  and the solid-state  $^{13}\text{C}$  NMR spectrum of **Py-CSSE**

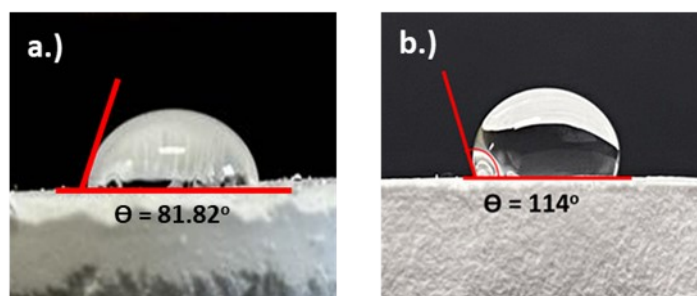

**Figure. S3** The contact angle and wettability measurement of **Py-CSSE** (a) without HMDSO modification and (b) with HMDSO modification

**Table. S1** FTIR peak assignments

| Frequency ( $\text{cm}^{-1}$ ) | Vibrational mode         |
|--------------------------------|--------------------------|
| 793                            | Si–O–Si bending          |
| 968                            | <i>Trans</i> C=C bending |
| 1072, 1129                     | Si–O–Si stretching       |
| 1260                           | Si–CH                    |
| 1406                           | C–H vinyl bending        |
| 1600                           | Aromatic C=C stretching  |
| 2959                           | C–H stretching           |
| 3023                           | Aromatic C–H stretching  |
| 3064                           | C–H vinyl stretching     |
| 3250-3500                      | OH stretching            |

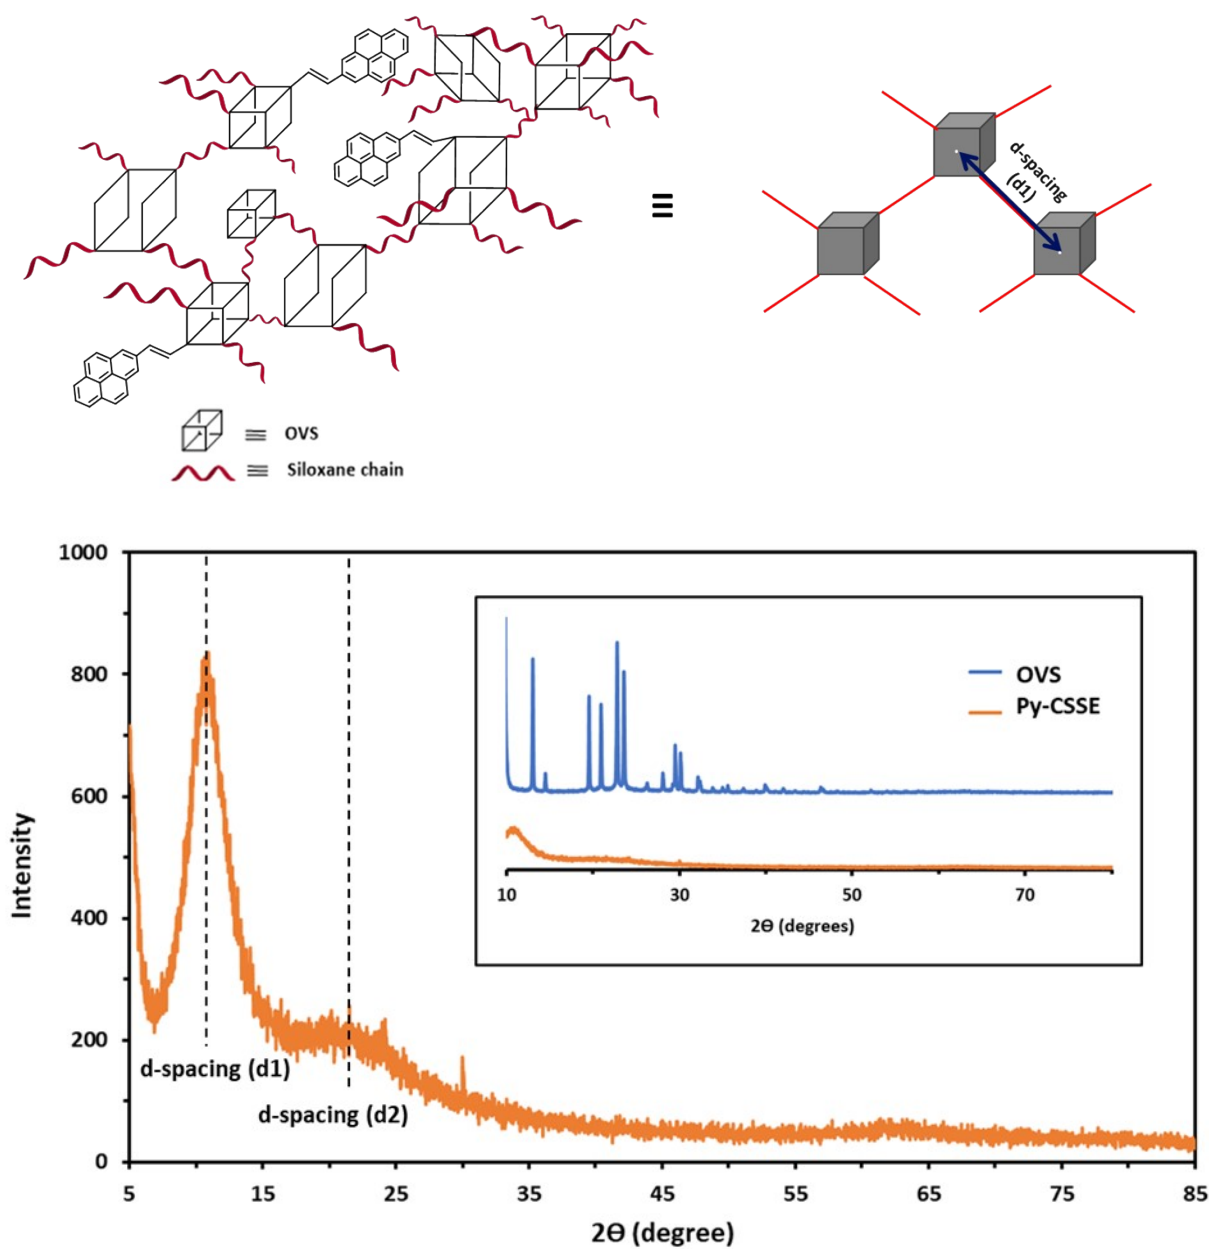

**Figure. S4** XRD diffraction curves of OVS (Blue) and Py-CSSE (Orange) samples

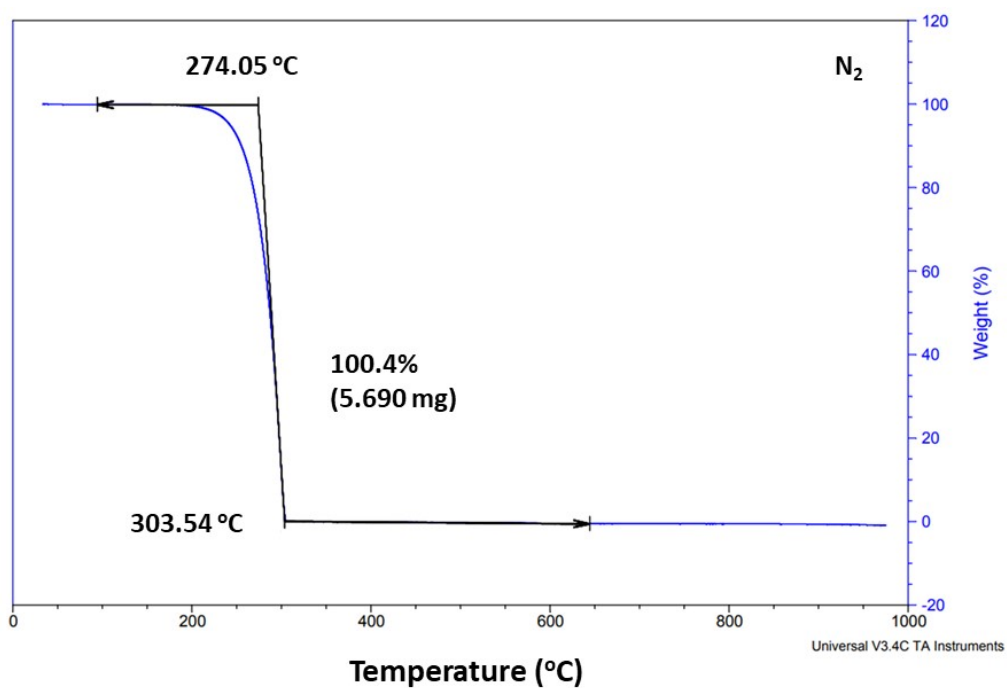

**Figure. S5** Thermal gravimetric analysis (TGA) of octavinylsilsesquioxane (OVS) under N<sub>2</sub> atmosphere

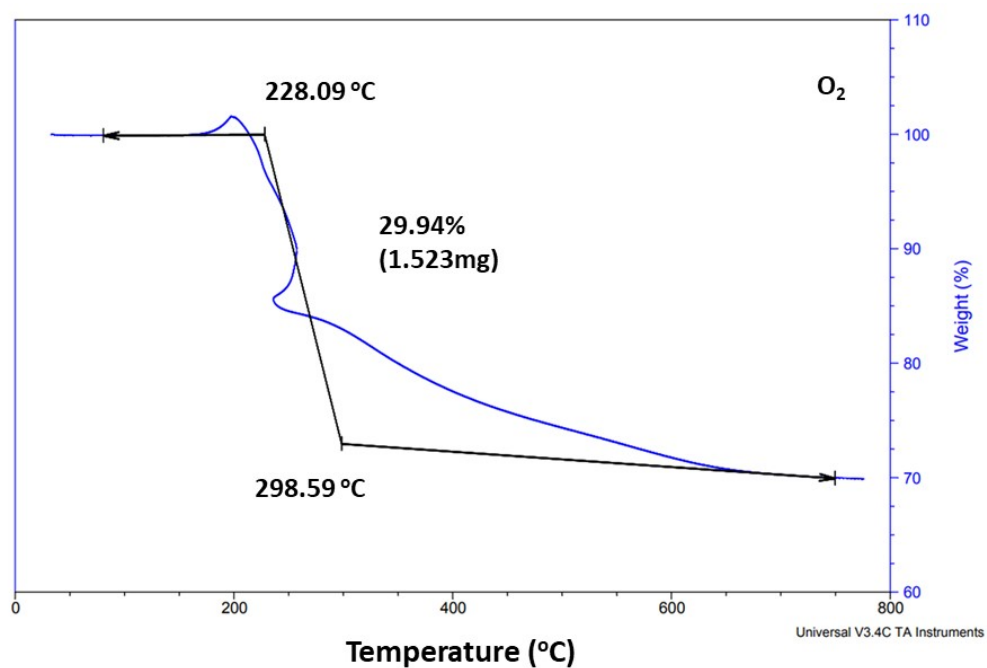

**Figure. S6** Thermal gravimetric analysis (TGA) of octavinylsilsesquioxane (OVS) under O<sub>2</sub> atmosphere

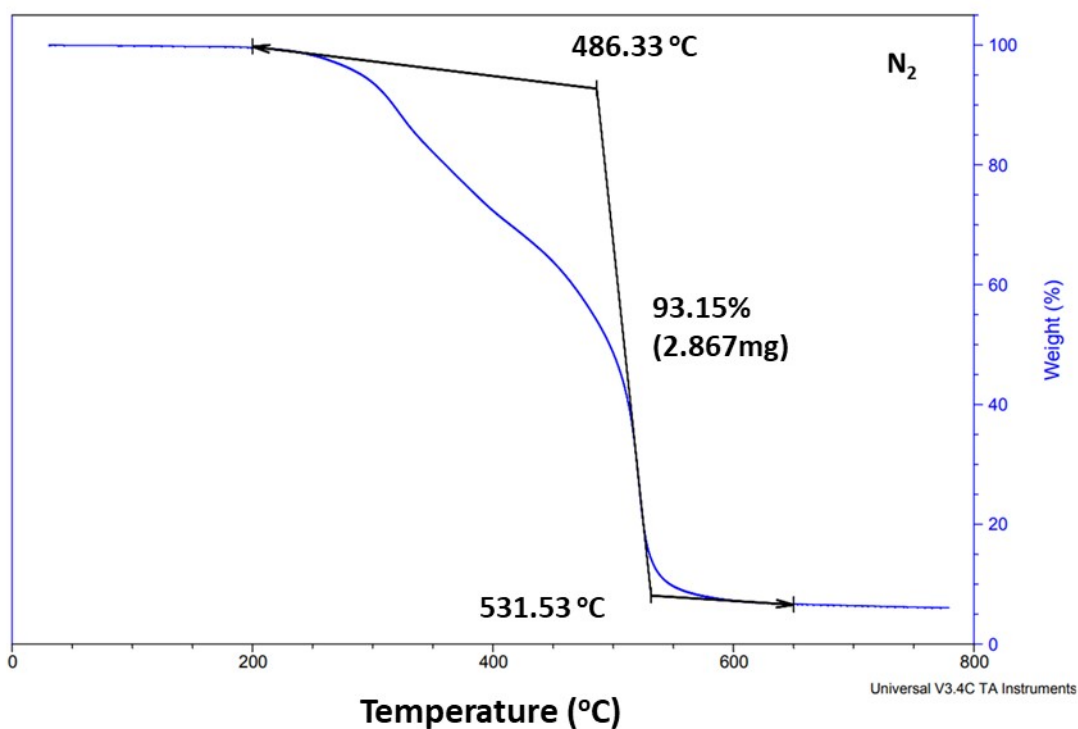

**Figure. S7** Thermal gravimetric analysis (TGA) of Py-CSSE under N<sub>2</sub> atmosphere

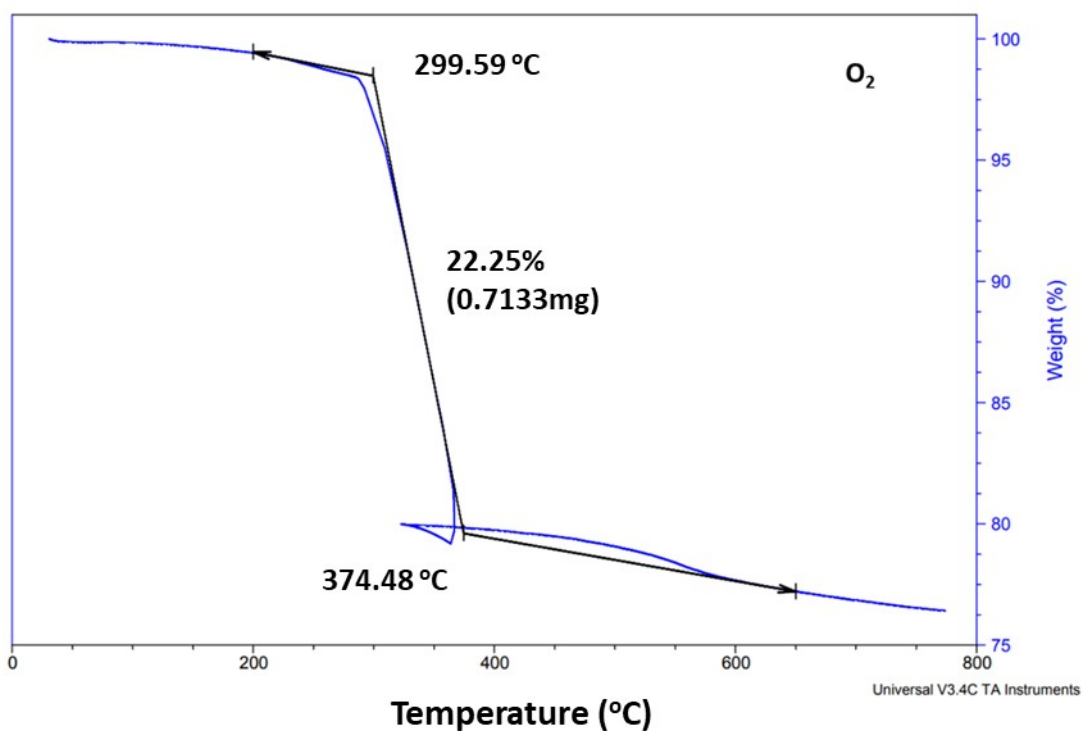

**Figure. S8** Thermal gravimetric analysis (TGA) of Py-CSSE under O<sub>2</sub> atmosphere

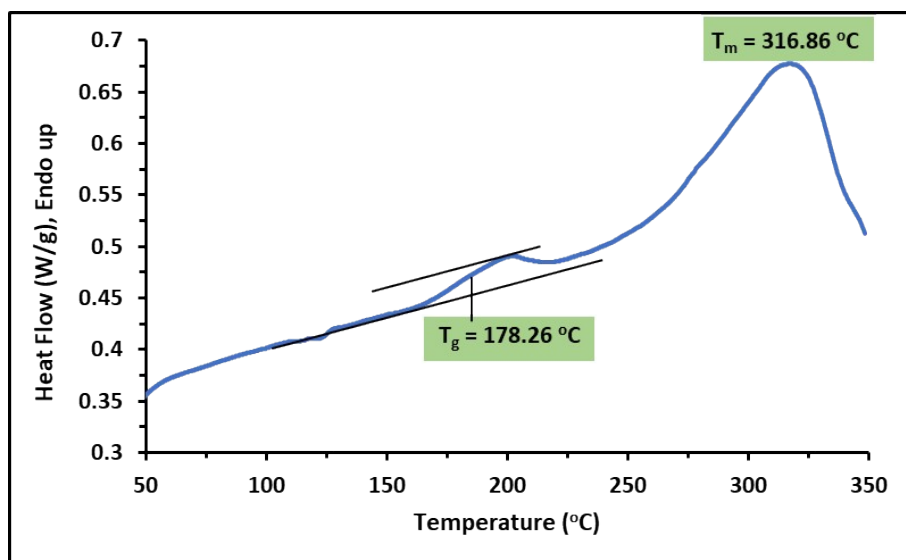

**Figure. S9** Differential scanning calorimeter (DSC) heating thermograms of Py-CSSE

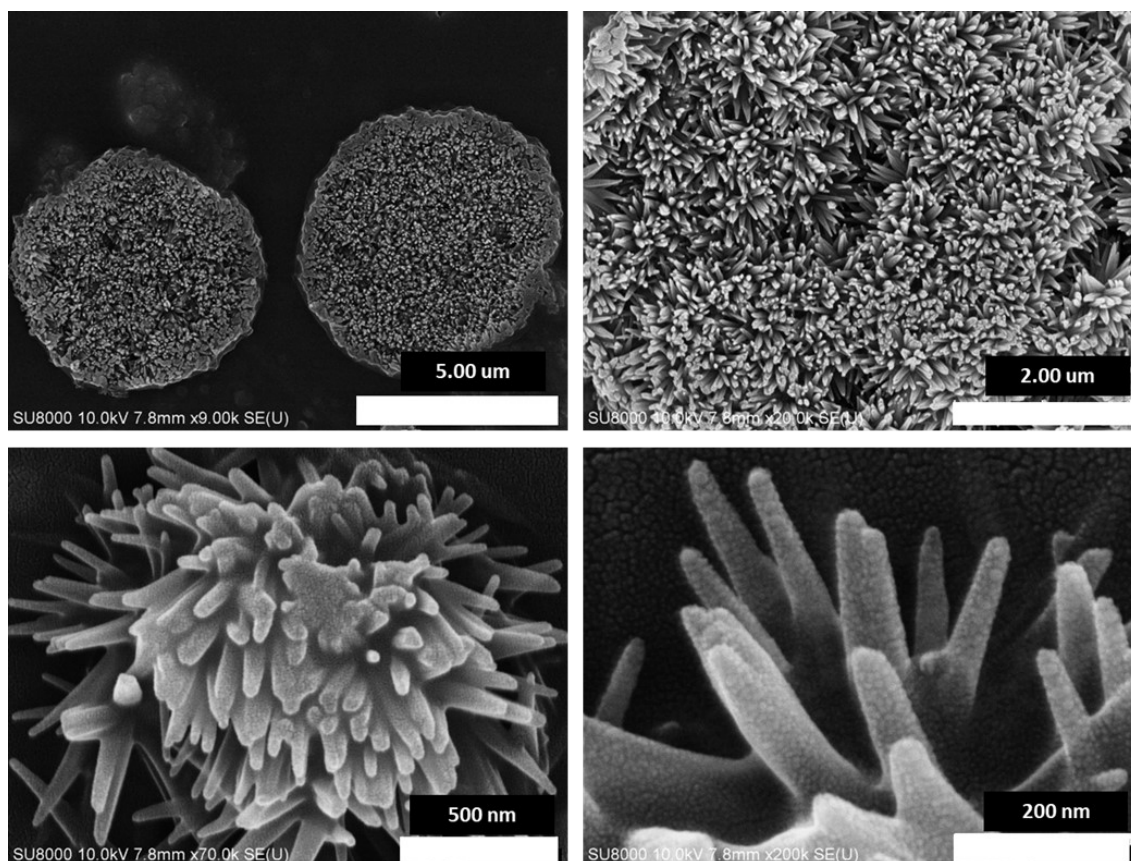

**Figure. S10** FESEM images of Py-CSSE

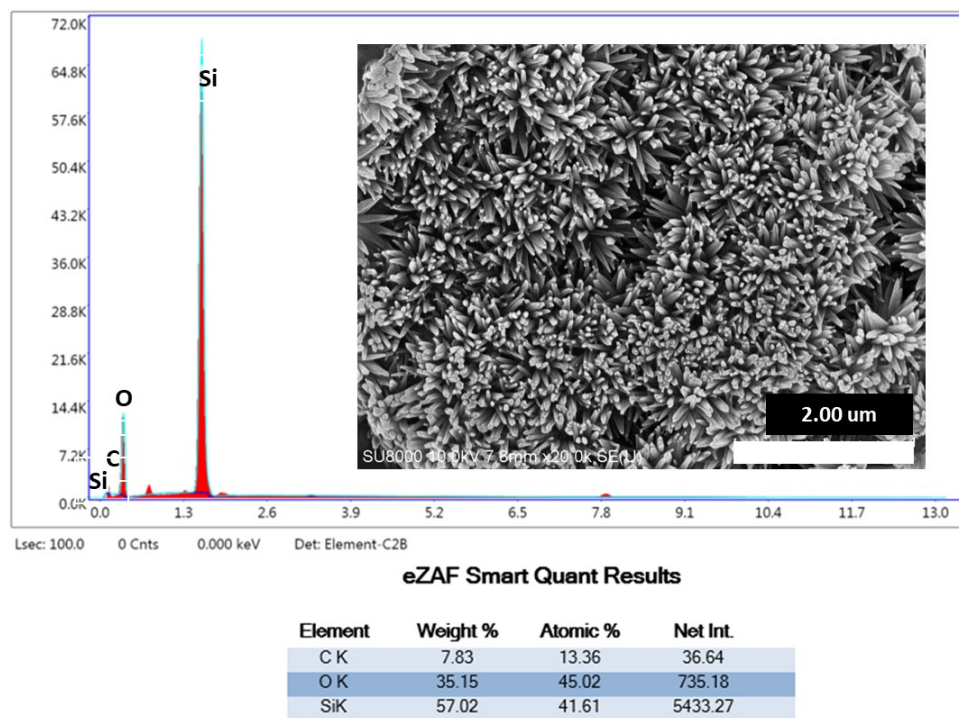

**Figure. S11** Energy Dispersive X-ray Analysis of a dried sample of **Py-CSSE** suspension in DMF medium.

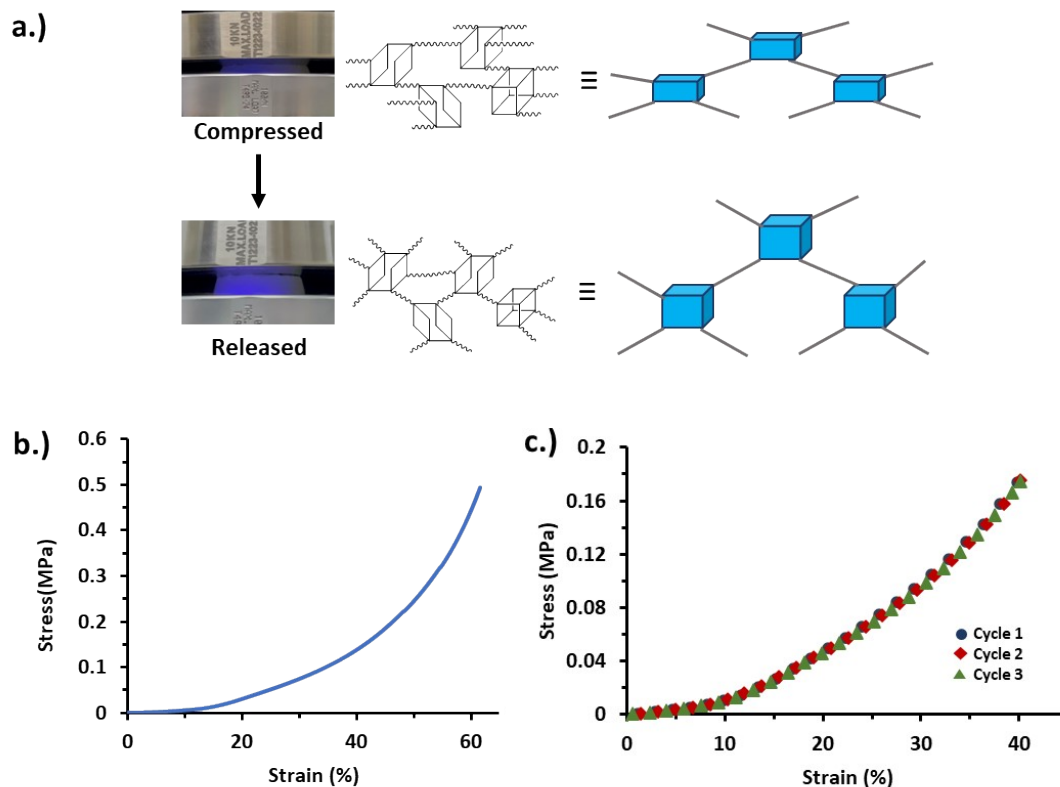

**Figure. S12** (a.) Schematic representing the compression-relaxation of **Py-CSSE** at 60% and 0% strain. (b.) The stress-strain curves of **Py-CSSE** structure with cylindrical specimen, obtained from uniaxial compression testing, and (c.) The stress-strain curves for **Py-CSSE** after 3 cycles.

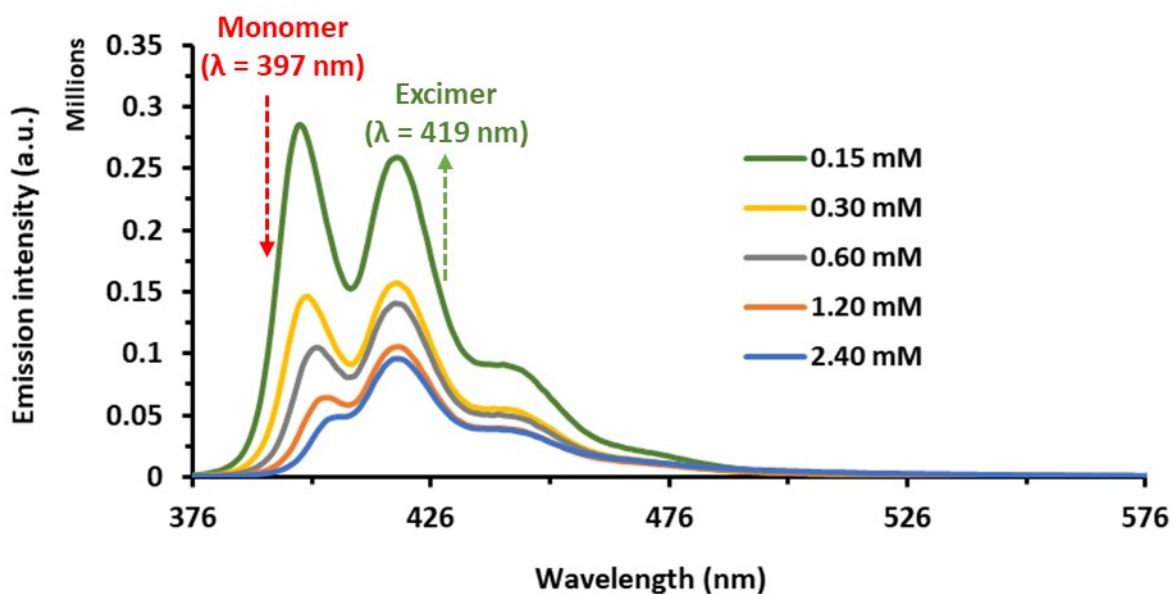

**Figure. S13** Concentration-Independent Excimer Formation of **Mono-PySQ** in THF solvent at various concentrations.

**Table. S2** Ratio of emission intensity of excimer ( $\lambda = 419$  nm) / monomer ( $\lambda = 397$  nm) in various concentrations.

|                                        | Concentration of <b>Mono-PySQ</b> in THF |         |         |         |         |
|----------------------------------------|------------------------------------------|---------|---------|---------|---------|
|                                        | 0.15 mM                                  | 0.30 mM | 0.60 mM | 1.20 mM | 2.40 mM |
| Ratio of $I_{\text{ex}}/I_{\text{mo}}$ | 0.95                                     | 1.27    | 2.20    | 4.11    | 8.64    |

**Table. S3** Adsorption capacity ( $\text{mol g}^{-1}$ ) values of CSSE and Py-CSSE in different solvent

| Solvent | CSSE    |         | Py-CSSE (This work) |        |
|---------|---------|---------|---------------------|--------|
|         | Average | SD      | Average             | SD     |
| Hexane  | 0.0232  | 0.0003  | 0.0275              | 0.0019 |
| THF     | 0.0438  | 0.0040  | 0.0450              | 0.0018 |
| DCM     | 0.0424  | 0.0016  | 0.0519              | 0.0034 |
| DMF     | 0.0173  | 0.0024  | 0.0238              | 0.0033 |
| EtOH    | 0.0214  | 0.0012  | 0.0283              | 0.0069 |
| MeOH    | 0.0304  | 0.0029  | 0.0334              | 0.0044 |
| Water   | 0.0028  | 0.00009 | 0.0020              | 0.0026 |

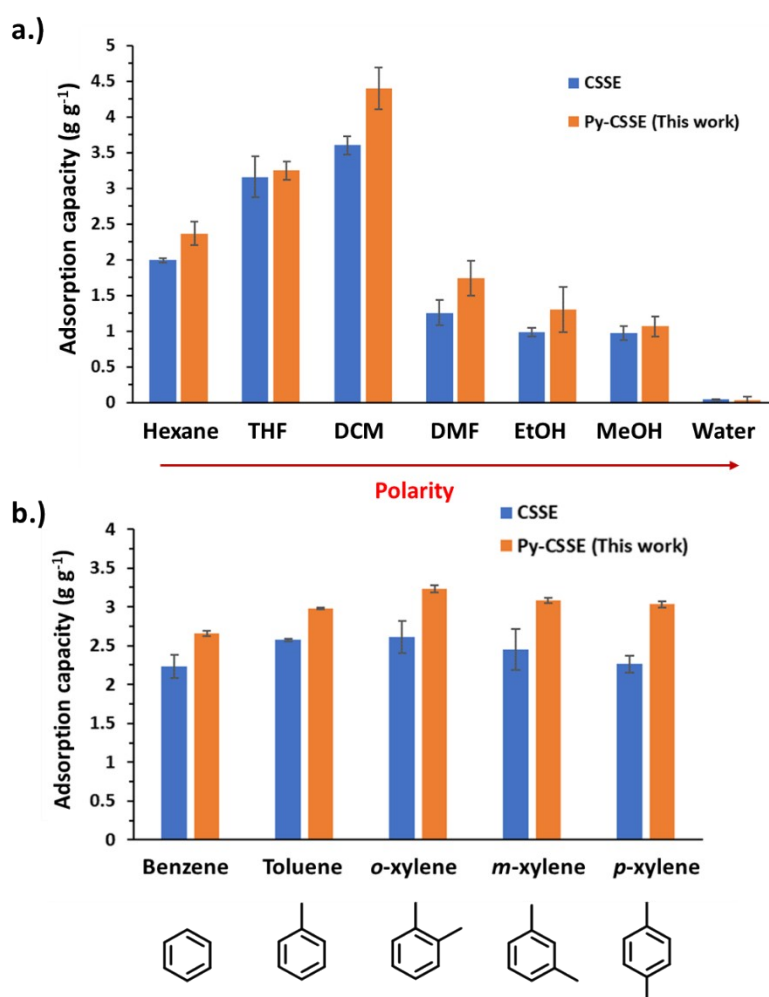**Figure. S14** Adsorption capacities of Py-CSSE and CSSE towards (a) various solvents reported in  $\text{g g}^{-1}$  and (b) BTX reported in  $\text{g g}^{-1}$ .



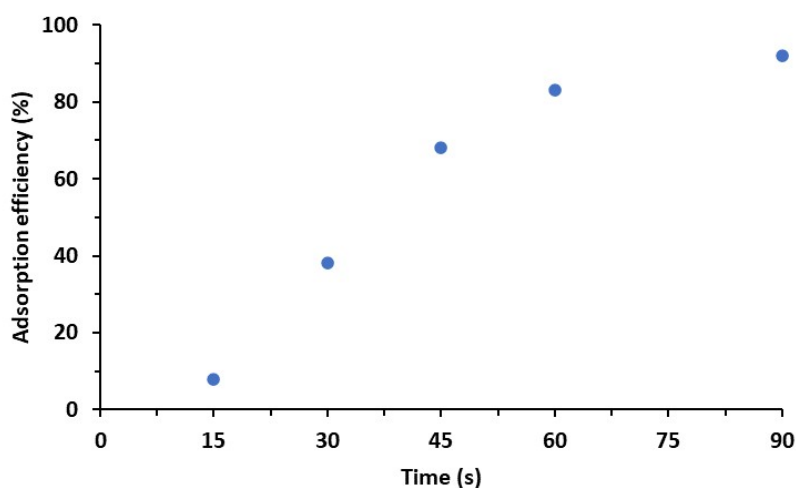

**Figure. S15** The time-dependent adsorption capacity of Py-CSSE for *o*-xylene adsorption

**Table. S4** The BTX adsorption comparison of synthesized materials

| Materials                                                            | BTX adsorption                                                                 | Maximum adsorption capacity                                                                                                    | Ref.      |
|----------------------------------------------------------------------|--------------------------------------------------------------------------------|--------------------------------------------------------------------------------------------------------------------------------|-----------|
| Organoclays                                                          | Benzene<br>Toluene<br><i>p</i> -xylene                                         | 0.012 mmol g <sup>-1</sup><br>0.030 mmol g <sup>-1</sup><br>0.140 mmol g <sup>-1</sup>                                         | 1.        |
| Periodic mesoporous organosilica                                     | Benzene<br>Toluene<br><i>p</i> -xylene<br><i>o</i> -xylene                     | 0.6803 mg g <sup>-1</sup><br>0.6601 mg g <sup>-1</sup><br>0.6300 mg g <sup>-1</sup><br>0.6207 mg g <sup>-1</sup>               | 2.        |
| SBA-15 from rice husk                                                | Toluene<br>xylene                                                              | 175.44 mg g <sup>-1</sup><br>142.86 mg g <sup>-1</sup>                                                                         | 3.        |
| Metal ion-exchanged Y zeolite (NaY zeolite)                          | <i>p</i> -xylene<br><i>m</i> -xylene<br><i>o</i> -xylene                       | 9.76 wt%<br>11.86 wt%<br>8.28 wt%                                                                                              | 4.        |
| Carbon-based honeycomb monoliths                                     | <i>o</i> -xylene                                                               | 550 μmol g <sup>-1</sup>                                                                                                       | 5.        |
| Fe-Al/Bentonite                                                      | Benzene<br>Toluene<br><i>o</i> -xylene                                         | 175.13 μg g <sup>-1</sup><br>171.84 μg g <sup>-1</sup><br>171.81 μg g <sup>-1</sup>                                            | 6.        |
| Pyrene-functionalized cross-linked siloxane/silsesquioxane elastomer | Benzene<br>Toluene<br><i>p</i> -xylene<br><i>m</i> -xylene<br><i>o</i> -xylene | 2.65 g g <sup>-1</sup><br>2.98 g g <sup>-1</sup><br>3.03 g g <sup>-1</sup><br>3.07 g g <sup>-1</sup><br>3.23 g g <sup>-1</sup> | This work |

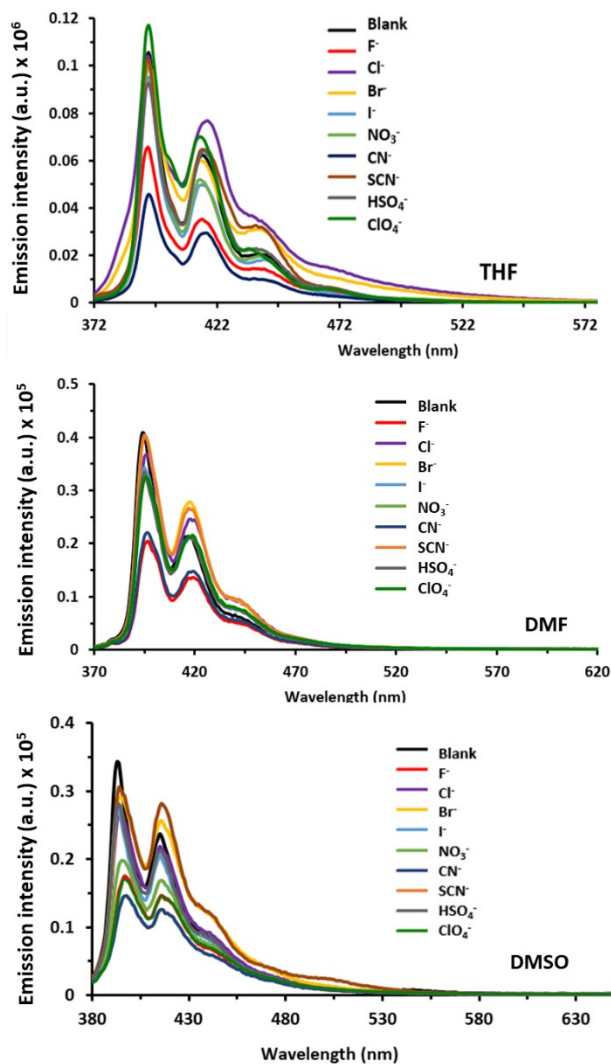

**Figure. S16** Fluorescence spectra of Py-CSSE (1 mg/mL) in various solvents before and after the addition of  $0.2 \times 10^{-6}$  M of anions (50  $\mu$ l).

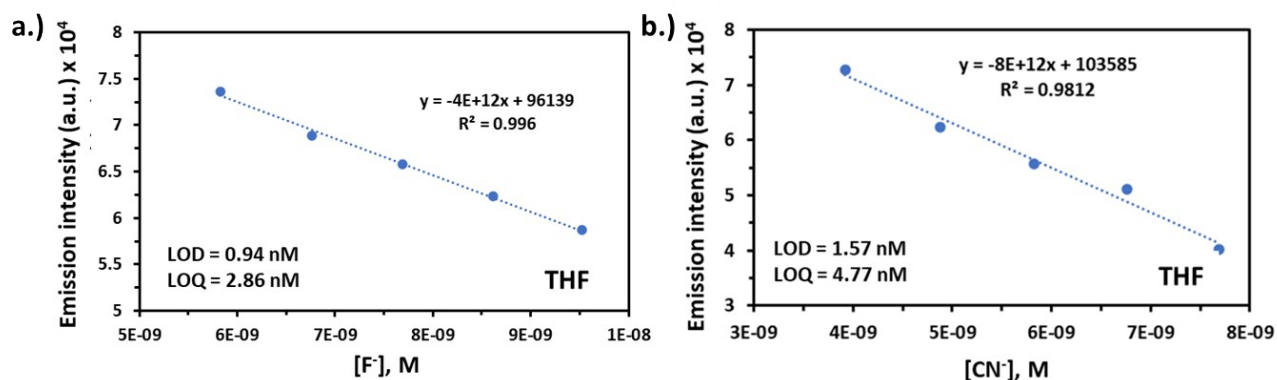

**Figure. S17** LOD and LOQ plot from fluorescence titration of Py-CSSE (2 mg) with (a.) fluoride ion and (b.) cyanide ion in THF solvents.

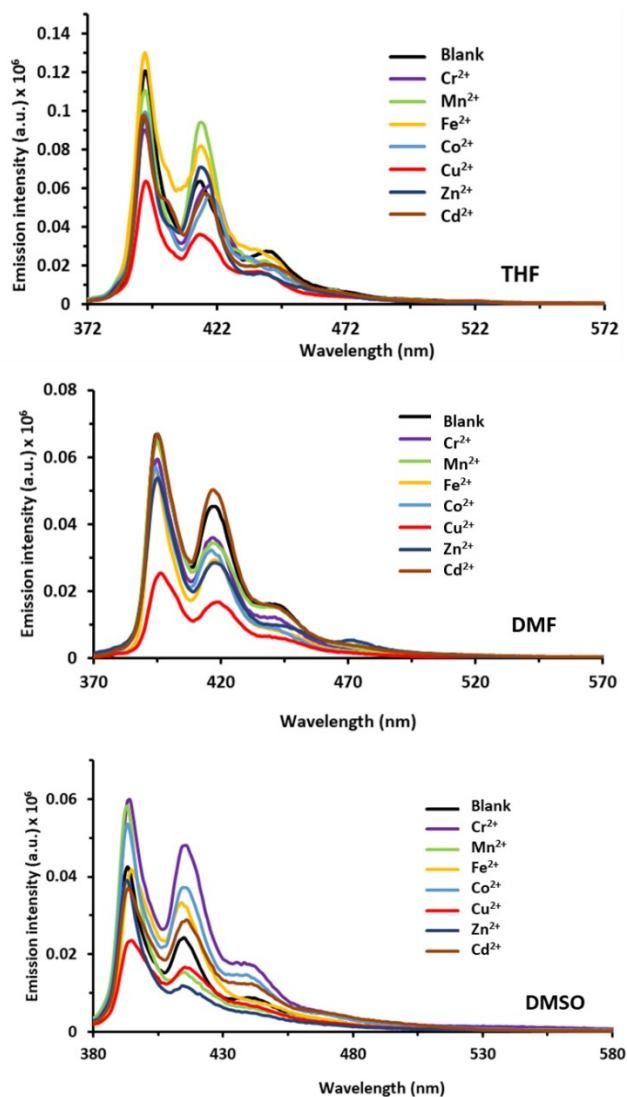

**Figure. S18** Fluorescence spectra of Py-CSSE (1 mg/mL) in various solvents before and after the addition of  $0.2 \times 10^{-6}$  M of cations (50  $\mu\text{l}$ ).

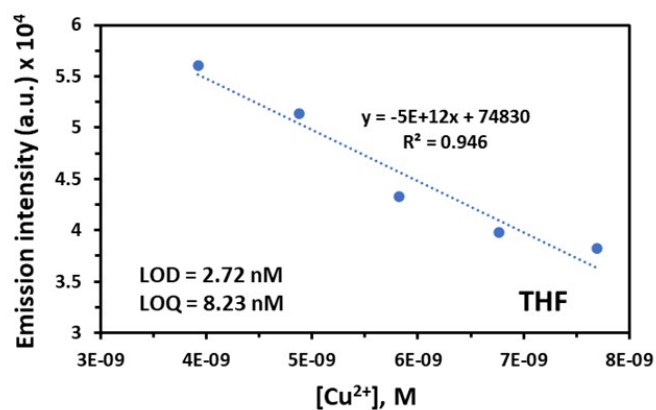

**Figure. S19** LOD and LOQ plot from fluorescence titration of Py-CSSE (2 mg) with copper ion in THF solvents.

**Table. S5** LOD and LOQ of Py-CSSE with fluoride, cyanide and copper ions from fluorescence emission titration.

| Solvent     | Fluoride ion (F <sup>-</sup> ) |          | Cyanide ion (CN <sup>-</sup> ) |          | Copper ion (Cu <sup>2+</sup> ) |          |
|-------------|--------------------------------|----------|--------------------------------|----------|--------------------------------|----------|
|             | LOD (nM)                       | LOQ (nM) | LOD (nM)                       | LOQ (nM) | LOD (nM)                       | LOQ (nM) |
| <b>THF</b>  | 0.94                           | 2.86     | 1.57                           | 4.77     | 2.72                           | 8.23     |
| <b>DMF</b>  | 2.46                           | 7.46     | 1.58                           | 4.80     | 1.65                           | 4.99     |
| <b>DMSO</b> | 4.14                           | 12.54    | 2.55                           | 7.74     | 2.04                           | 6.18     |

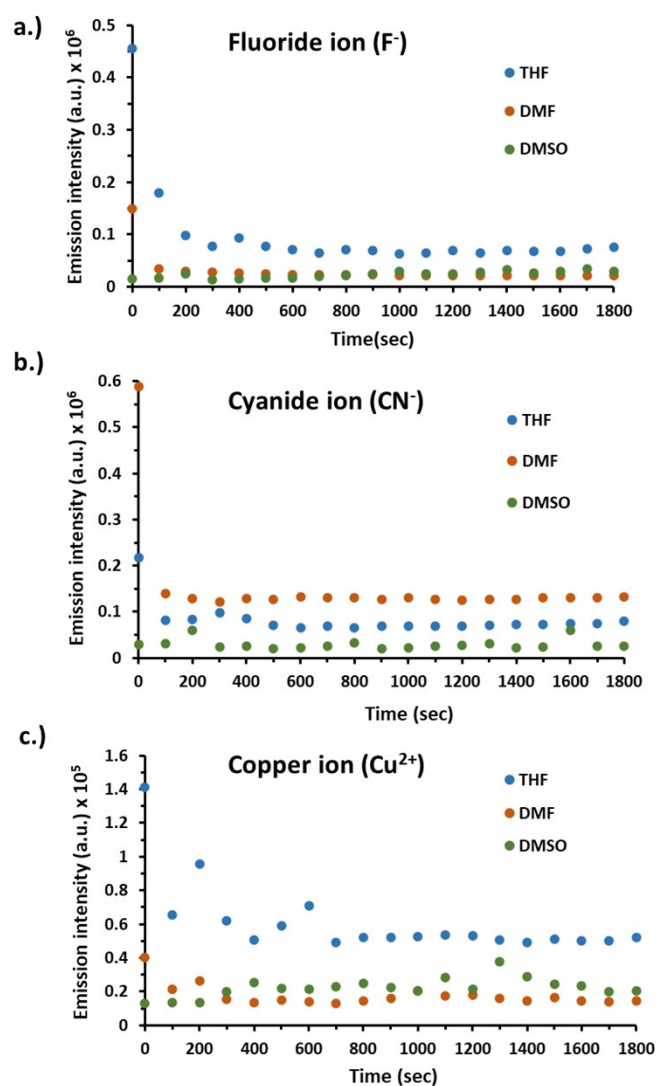

**Figure. S20** The kinetics of Py-CSSE (1 mg mL<sup>-1</sup>) upon excessive addition of a.) TBAF b.) TBACN and c.) Cu(ClO<sub>4</sub>)<sub>2</sub> 0.2 x 10<sup>-6</sup> M 50 μl in various solvents

**Table. S6** Kinetic constant of the reaction between Py-CSSE with anions (F<sup>-</sup> and CN<sup>-</sup>) and metal (Cu<sup>2+</sup>) in different media

| Kinetic constant ( <i>k</i> ) x 10 <sup>-3</sup> sec <sup>-1</sup> |                |                 |                  |
|--------------------------------------------------------------------|----------------|-----------------|------------------|
| Solvent                                                            | F <sup>-</sup> | CN <sup>-</sup> | Cu <sup>2+</sup> |
| THF                                                                | 2.1            | 8.8             | 5.1              |
| DMF                                                                | 2.5            | 1.5             | 6.5              |
| DMSO                                                               | 1.5            | 3.9             | 4.2              |

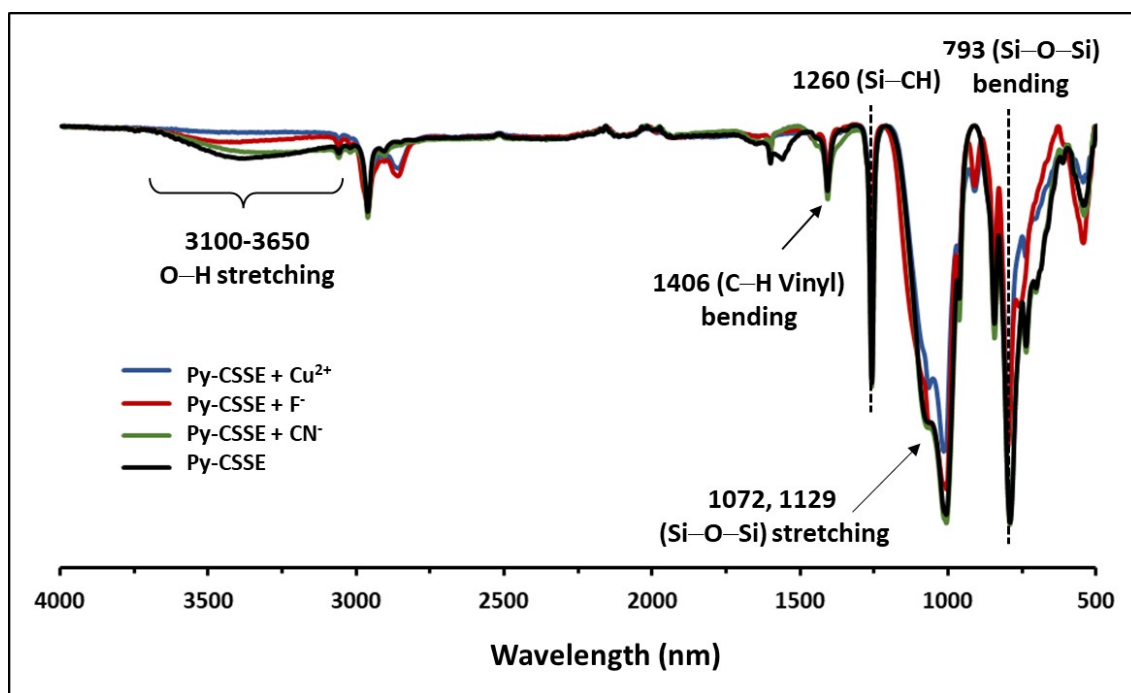

Figure. S21 FTIR spectra of Py-CSSE before and after ion addition

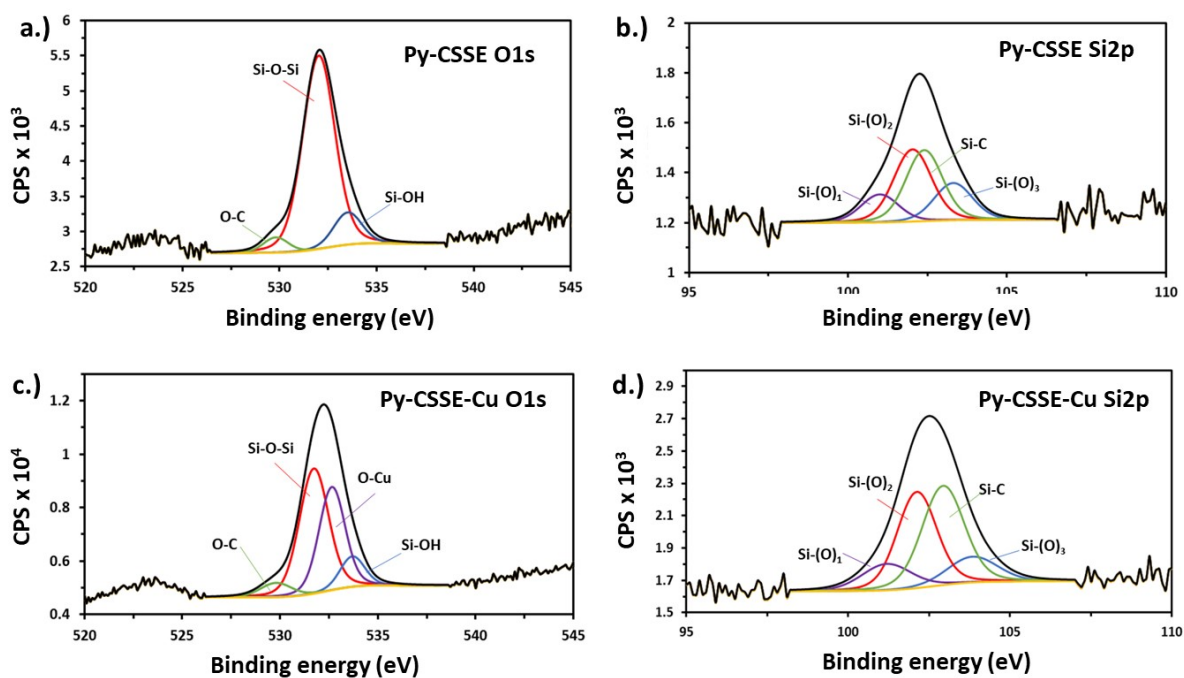

Figure. S22 XPS spectra of Py-CSSE a.) O1s b.) Si 2p and Py-CSSE+Cu<sup>2+</sup> c.) O1s d.) Si 2p

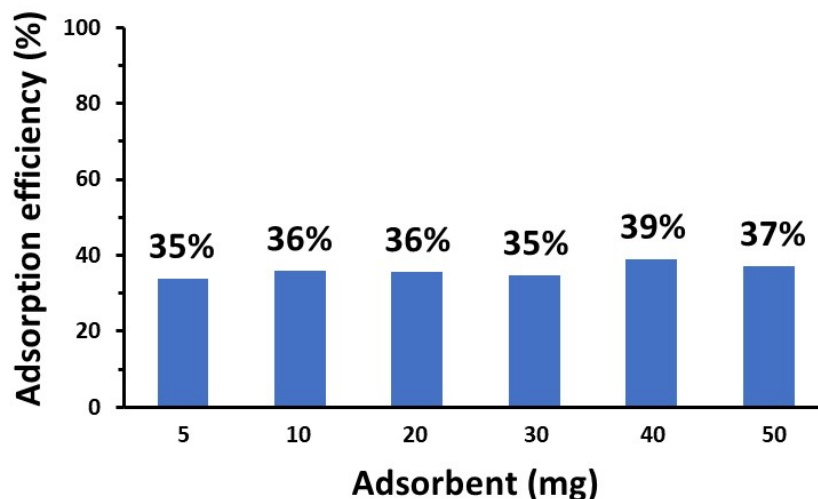

**Figure. S23** The  $\text{Cu}^{2+}$  adsorption efficiency of Py-CSSE by varying amounts of adsorbent

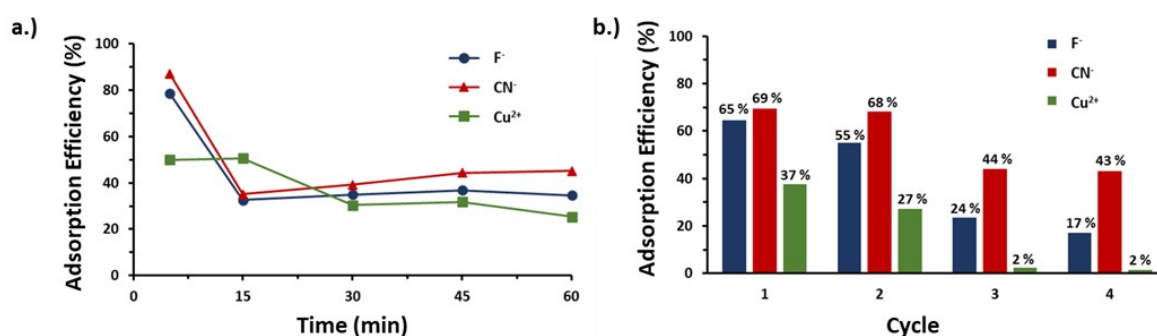

**Figure. S24** (a) The time-dependent adsorption efficiency. (b) The reusability of Py-CSSE (Adsorption dose, 10 mg; Concentration:  $\text{F}^-$  (0.96 mM)  $\text{CN}^-$  (0.37 mM) and  $\text{Cu}^{2+}$  (0.37 mM) ions.) in THF solvent

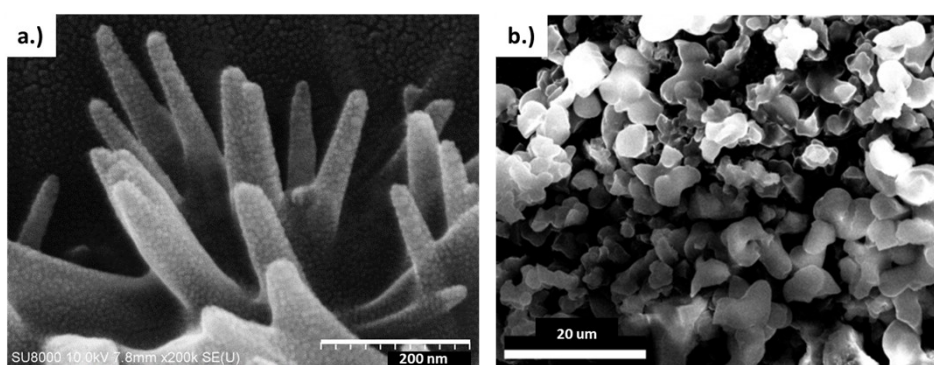

**Figure. S25** FESEM image of a dried sample of Py-CSSE (a) before and (b) after  $\text{Cu}^{2+}$  addition

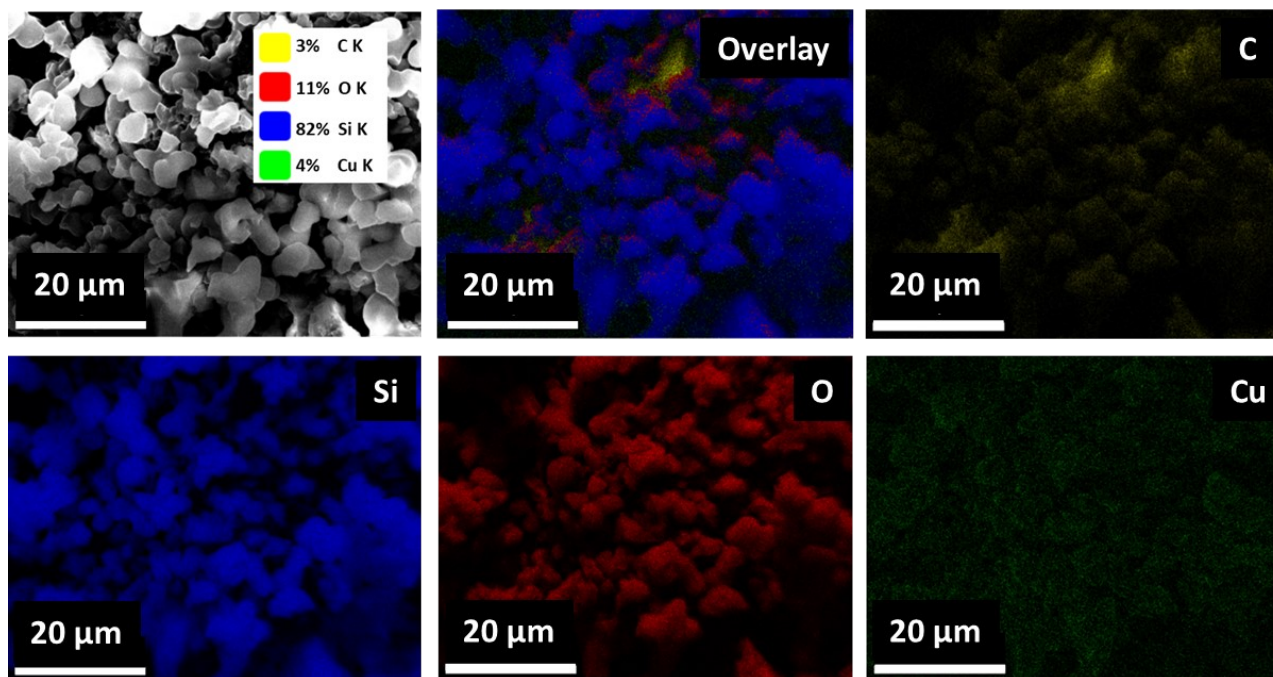

**Figure. S26** Elemental mapping of a dried sample of Py-CSSE that had adsorbed  $\text{Cu}^{2+}$  ions

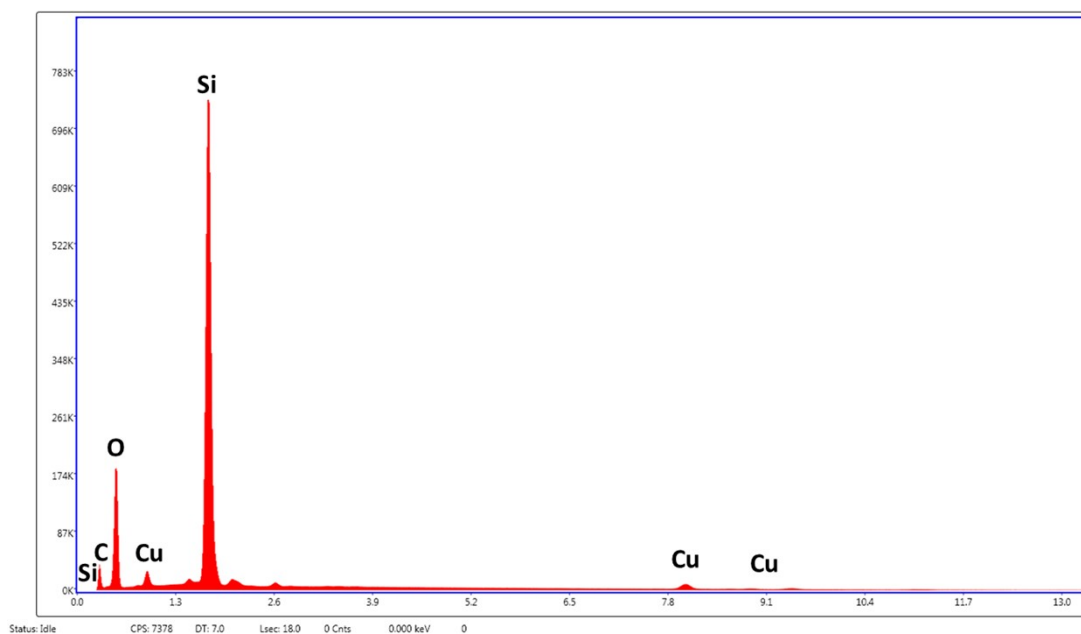

**eZAF Smart Quant Results**

| Element | Weight % | Atomic % | Net Int. | Error % | Kratio     | Z      | A      | F      |
|---------|----------|----------|----------|---------|------------|--------|--------|--------|
| C K     | 12.64    | 20.76    | 78.71    | 10.28   | 0.01603648 | 1.0905 | 0.1164 | 1.0000 |
| O K     | 36.45    | 44.95    | 880.46   | 8.61    | 0.09148939 | 1.0447 | 0.2402 | 1.0000 |
| SiK     | 47.18    | 33.14    | 4936.32  | 2.90    | 0.3650796  | 0.9513 | 0.8129 | 1.0007 |
| CuK     | 3.73     | 1.16     | 82.78    | 3.18    | 0.03205944 | 0.7672 | 1.0095 | 1.1095 |

**Figure. S27** Energy Dispersive X-ray Analysis of a dried sample of Py-CSSE that had adsorbed  $\text{Cu}^{2+}$  ions



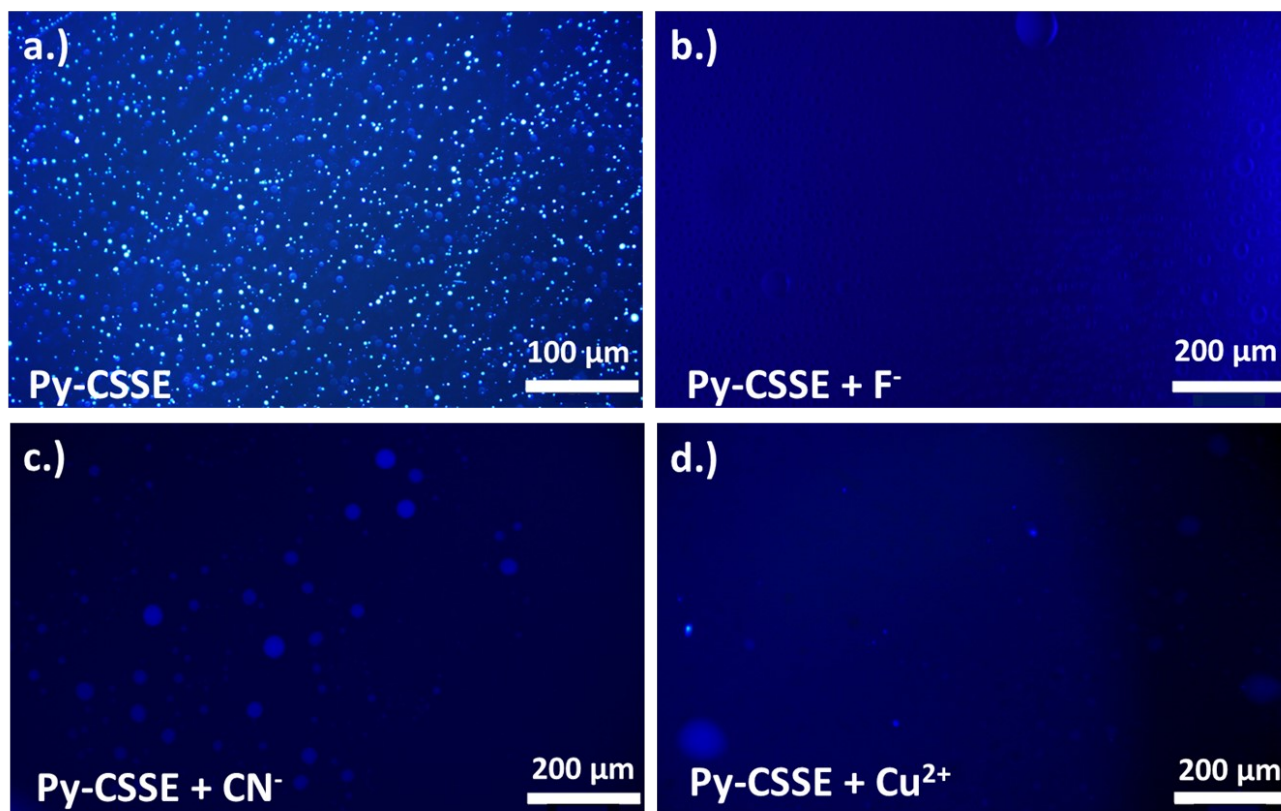

**Figure. S28** Epifluorescence microscopy of a.) Py-CSSE b.) Py-CSSE+F<sup>-</sup> c.) Py-CSSE+CN<sup>-</sup> and d.) Py-CSSE+Cu<sup>2+</sup> in DMF

### Supplementary Movies

Video S1. This video shows the synthesis of Py-CSSE.

### References

1. L. F. Lima, J. R. de Andrade, M. G. C. da Silva and M. G. A. Vieira, *Industrial & Engineering Chemistry Research*, 2017, 56, 6326-6336.
2. C. P. Moura, C. B. Vidal, A. L. Barros, L. S. Costa, L. C. G. Vasconcellos, F. S. Dias and R. F. Nascimento, *Journal of Colloid and Interface Science*, 2011, 363, 626-634.
3. Y. Prestianggi, N. Maylisa, R. D. Subagyo and S. Sitorus, 2019.
4. P. Lahot, M. Rani and S. Maken, *Brazilian Journal of Chemical Engineering*, 2014, 31, 497-502.
5. J. M. Gatica, J. M. Rodríguez-Izquierdo, D. Sánchez, T. Chafik, S. Harti, H. Zaitan and H. Vidal, *Comptes Rendus Chimie*, 2006, 9, 1215-1220.
6. Z. Mèçabih, *Journal of Encapsulation and Adsorption Sciences*, 2017, 7, 40.
